# Supplementary material
Source: publisher figshare collection journal article supplement (https://acs.figshare.com/ndownloader/files/5674071)
Supplement: Supplementary file 1 [file 5674071]

# BIOCHEMISTRY

including biophysical chemistry & molecular biology

Biochemistry, 1997, 36(49), 15472-15476, DOI: [10.1021/bi971883i](https://doi.org/10.1021/bi971883i)

## Terms & Conditions

Electronic Supporting Information files are available without a subscription to ACS Web Editions. The American Chemical Society holds a copyright ownership interest in any copyrightable Supporting Information. Files available from the ACS website may be downloaded for personal use only. Users are not otherwise permitted to reproduce, republish, redistribute, or sell any Supporting Information from the ACS website, either in whole or in part, in either machine-readable form or any other form without permission from the American Chemical Society. For permission to reproduce, republish and redistribute this material, requesters must process their own requests via the RightsLink permission system. Information about how to use the RightsLink permission system can be found at <http://pubs.acs.org/page/copyright/permissions.html>

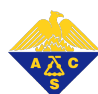

ACS Publications

MOST TRUSTED. MOST CITED. MOST READ.

Copyright © 1997 American Chemical Society

## SUPPLEMENTAL INFORMATION

### Figure 1. Mass Spectra of Control Reactions

(A). *Negative-ion electrospray ionization mass spectra of PEP*. A solution containing 10 mM ammonium acetate buffer was rapidly mixed with PEP (1000  $\mu$ M) for approximately 28 milliseconds before quenching into the electrospray mass spectrometer. Arrows denote peaks for PEP, PEP dimers and buffer and ion adducts. The mass spectra represent an average of 6 scans collected after an individual pulse of solution.

(B). *Negative-ion electrospray ionization mass spectra of Enz-S3P*. A solution containing enzyme (250  $\mu$ M) and S3P (500  $\mu$ M) was rapidly mixed with 10 mM ammonium acetate buffer for approximately 28 milliseconds before quenching into the electrospray mass spectrometer. Arrows denote peaks for S3P and buffer and ion adducts. The mass spectra represent an average of 30 scans collected after an individual pulse of solution.

(C). *Negative-ion electrospray ionization mass spectra of the EPSP synthase reaction at longer times*. A solution containing enzyme (250  $\mu$ M) and S3P (500  $\mu$ M) was rapidly mixed with PEP (1000  $\mu$ M) for approximately 2 seconds before quenching into the electrospray mass spectrometer. Arrows denote peaks for PEP, EPSP, and buffer and ion adducts. Note that at longer times no S3P ( $m/z$  253) or tetrahedral intermediate ( $m/z$  421) are observed. The mass spectra represent an average of 11 scans collected after an individual pulse of solution.

Fig. 1a

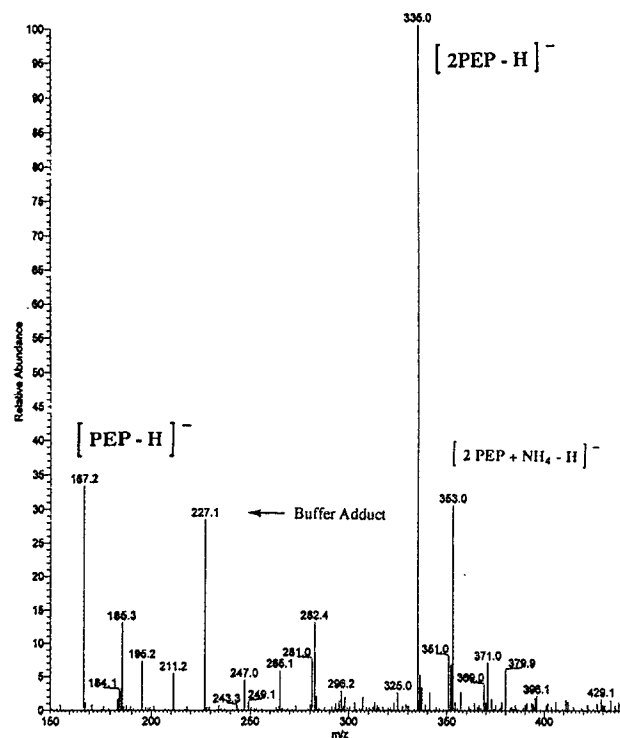

Fig. 1b

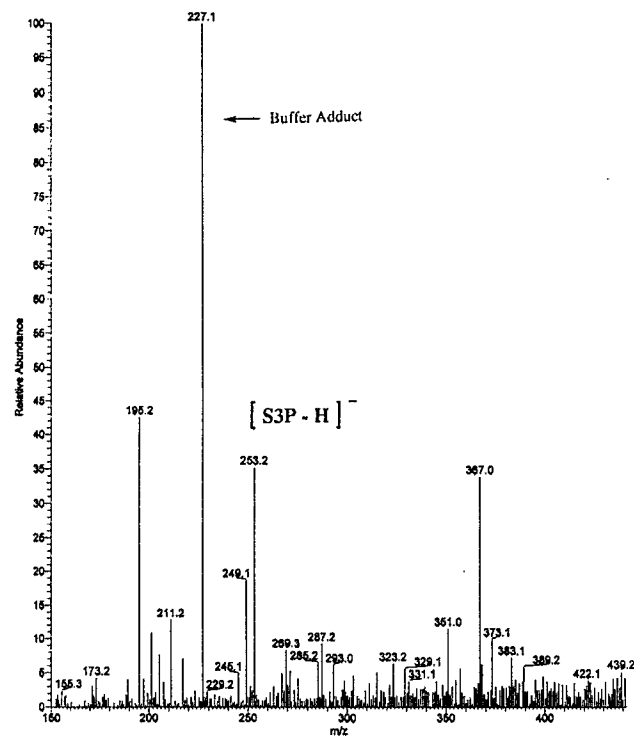

Fig. 1c

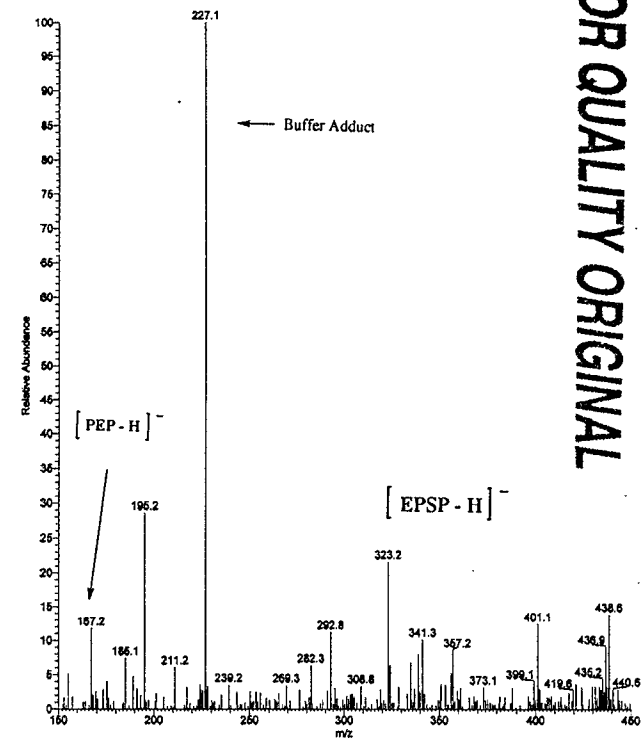

POOR QUALITY ORIGINAL
